# Supplementary material for: The Valence Band Structure of the [Ni(Salen)] Complex: An Ultraviolet, Soft X-ray and Resonant Photoemission Spectroscopy Study
Source: MDPI journal article supplement (doi:10.3390/ijms23116207), 2022-06-01
Supplement: s1 [file s1]

## Supplementary information

## Article

# The valence band structure of the [Ni(Salen)] complex: an ultra-violet, soft X-ray and resonant photoemission spectroscopy study

Petr M. Korusenko <sup>1,2\*</sup>, Alexandra V. Koroleva <sup>3</sup>, Anatoliy A. Vereshchagin <sup>4</sup>, Danil V. Sivkov <sup>1,5</sup>, Olga V. Petrova <sup>1,5</sup>, Oleg V. Levin <sup>4</sup>, and Alexander S. Vinogradov <sup>1</sup>

<sup>1</sup> Department of Solid State Electronics, St. Petersburg State University, 7/9 Universitetskaya nab., 199034 Saint Petersburg, Russia

<sup>2</sup> Department of Physics, Omsk State Technical University, 11 Mira prosp., 644050 Omsk, Russia

<sup>3</sup> Resource center "Physical methods of surface investigation", St. Petersburg State University, St. Petersburg State University, 7/9 Universitetskaya nab., 199034 Saint Petersburg, Russia

<sup>4</sup> Department of Electrochemistry, Institute of Chemistry, St. Petersburg State University, 7/9 Universitetskaya nab., 199034 Saint Petersburg, Russia

<sup>5</sup> Institute of Physics and Mathematics, Komi Science Centre of the Ural Branch of the Russian Academy of Sciences, 167982 Syktyvkar, Russia

\* Correspondence: p.korusenko@spbu.ru (P.M. Korusenko)

As can be seen from Figure S1, all presented survey spectra of H<sub>2</sub>Salen and the [Ni(Salen)] complex do not show any peaks from substrate elements or contaminant inclusions. Therefore, it can be stated that the monomer layers thus prepared are of high purity.

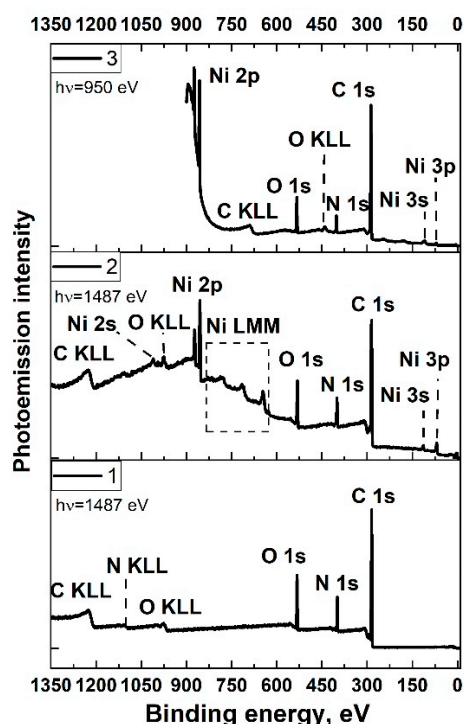

**Figure S1.** Survey PE spectra from the metal-free H<sub>2</sub>Salen (1) and [Ni(Salen)] complex deposited onto different substrate: (2) – Ti foil (ESCALAB 250 Xi); (3) – Pt plate (BESSY II electron storage ring, Russian-German beamline (RGLB))

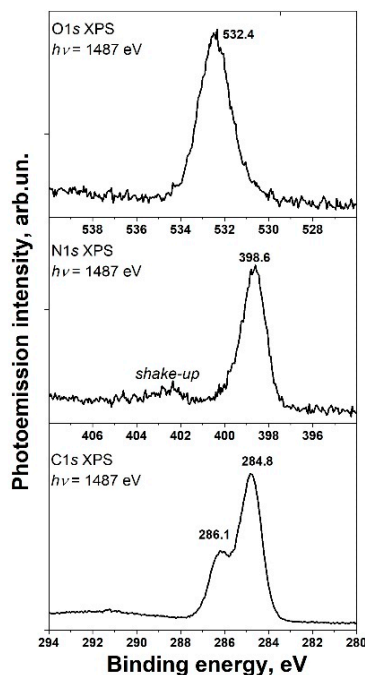

**Figure S2.** O 1s, N 1s and C 1s PE spectra of the H<sub>2</sub>Salen deposited onto Ti foil (ESCALAB 250 Xi)

It can be seen from Fig. S3 that the Ni 2p<sub>3/2,1/2</sub>, O 1s, N 1s and C 1s PE spectra measured from [Ni(Salen)] deposited onto the Pt and Ti substrates practically do not differ in shape, but differ in the position of the peak maxima. This shift is |0.3| eV and is the result of differences in the calibration of the spectrometers.

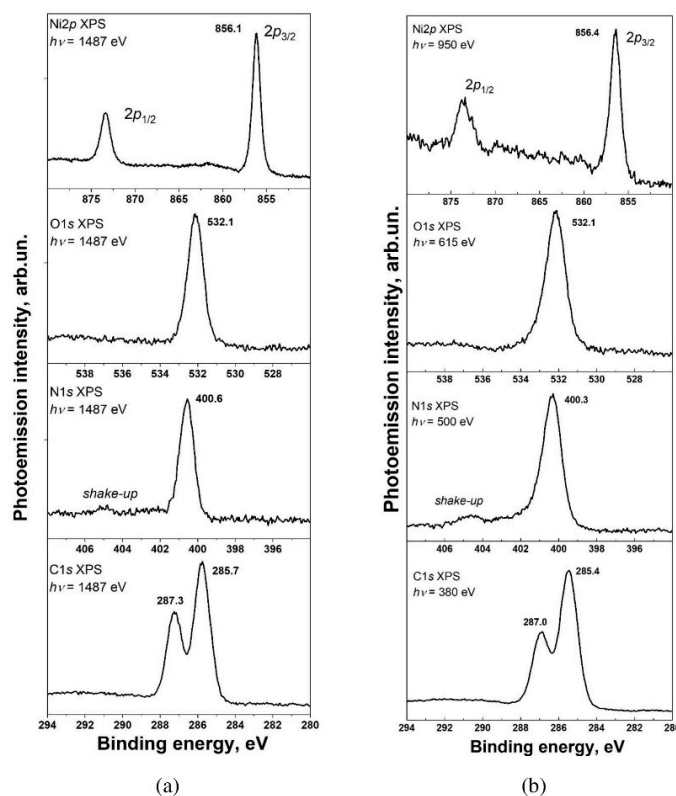

**Figure S3.** Ni 2p<sub>3/2,1/2</sub>, O 1s, N 1s and C 1s PE spectra of the [Ni(Salen)] complex deposited onto different substrate: (a) – Ti foil (ESCALAB 250 Xi); (b) – Pt plate (BESSY II electron storage ring, Russian-German beamline (RGLB))
